# Supplementary material
Source: PubMed Central journal article supplement (PMC2932823)
Supplement: NIHMS227564-supplement-1_si_001.pdf [file NIHMS227564-supplement-1_si_001.pdf]

## Supporting Information

### **Ion-Selective Permeability of Ultrathin Nanoporous Silicon Membrane as Probed by Scanning Electrochemical Microscopy Using Micropipet-Supported ITIES Tips**

Ryoichi Ishimatsu,<sup>†</sup> Jiyeon Kim,<sup>†</sup> Ping Jing,<sup>†</sup> Christopher C. Striemer,<sup>‡</sup> David Z. Fang,<sup>‡</sup>

Philippe M. Fauchet,<sup>‡</sup> James L. McGrath,<sup>§</sup> and Shigeru Amemiya<sup>\*,†</sup>

<sup>†</sup>*Department of Chemistry, University of Pittsburgh, Pittsburgh, Pennsylvania 15260, and* <sup>‡</sup>*Department of Electrical and Computer Engineering, and* <sup>§</sup>*Department of Biomedical Engineering, University of Rochester, Rochester, New York 14627*

<sup>#</sup> Current address: Shandong Entry-Exit Inspection and Quarantine Bureau, P. R. China

\* To whom correspondence should be addressed. E-mail: amemiya@pitt.edu. Fax: 412-624-5259.

**Preparation of Heat-Pulled Micropipets.** The following program was used for a CO<sub>2</sub>-laser capillary puller (model P-2000 Sutter Instrument Co., Novato, CA) to prepare heat-pulled micropipets. A glass capillary was separated during the last line of the program.

| Line | Heat | Fil | Vel | Del | Pul |
|------|------|-----|-----|-----|-----|
| 1    | 470  | 4   | 19  | 150 | 0   |
| 2    | 460  | 4   | 19  | 150 | 0   |
| 3    | 450  | 4   | 19  | 150 | 0   |
| 4    | 440  | 4   | 19  | 150 | 0   |
| 5    | 430  | 4   | 19  | 150 | 0   |
| 6    | 420  | 4   | 19  | 150 | 0   |

**SICM of FIB-Milled and Non-Milled Micropipets.** SICM approach curves as obtained with FIB-milled and non-milled tips were compared to demonstrate the improved smoothness and alignment of a FIB-milled micropipet (Figure S1). For a comparison, a pair of micropipets was pulled from the same capillary, and the tip of a pipet was milled by FIB. In SICM experiments, the ionic current between a Ag/AgCl electrode inside a water-filled micropipet and a Ag/AgCl electrode placed in the bulk aqueous solution was measured with a bias of 0.3 V between the electrodes. The resulting steady-state current was only 5% larger for the FIB-milled pipet than for the non-milled pipet, thereby confirming a small increase in the tip diameter by FIB milling. As the FIB-milled and non-milled tips approached to a Si wafer substrate, the ionic tip current was eventually blocked by the substrate. The tip current was normalized with respect to the current in the bulk solution so that the approach curves with FIB-milled and non-milled tips partially overlap with each other (Figure S1). This comparison shows

that the FIB-milled tip can approach closer to the substrate to give a lower tip current. Noticeably, the current at the FIB-milled tip decreased only to ~70 % of the current in the bulk solution. The recent theory of SICM suggests that this modest current change is expected at a short tip–substrate distance of <10% of the tip radius.<sup>S1</sup> This result confirms that the glass orifice of a FIB-milled tip can be brought very close to the substrate surface prior to contact. Quantitative understanding of a SICM response, however, requires a more advanced model.<sup>S1</sup>

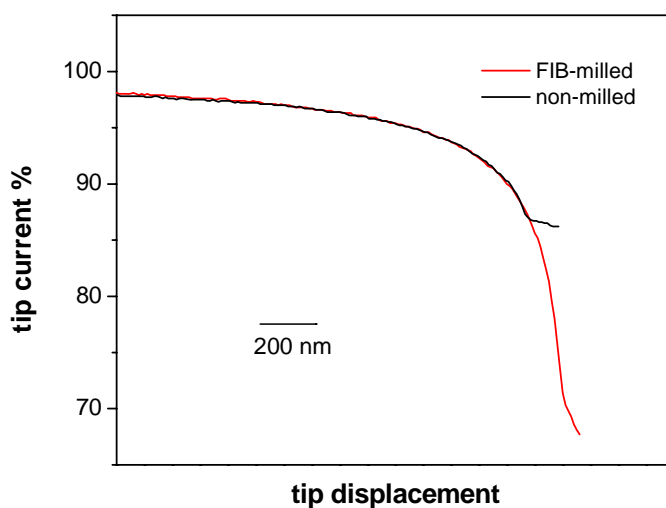

**Figure S1.** SICM approach curves at a SiO<sub>2</sub> substrate as obtained using FIB-milled and non-milled micropipets. Probe scan rate, 0.15  $\mu\text{m/s}$ .

**Finite Element Simulations.** SECM approach curves were simulated by solving the corresponding 2D diffusion problems using the finite element method with COMSOL Multiphysics® version 3.5a (COMSOL, Inc., Burlington, MA) as described elsewhere.<sup>S2</sup> In this work, pipet-supported liquid/liquid interfaces with disk and sphere-cap geometries were considered for monovalent ions and polyions, respectively. The model and boundary conditions are given in Figure 3a. An impermeable membrane was considered to simulate approach curves to SiO<sub>2</sub> substrates. The  $x$  values in eq 1 were calculated by setting  $d/a = 50$ . The example of the simulation for an interface with sphere-cap geometry ( $h/a = 0.38$  for protamine) is attached. In this example, membrane permeability is given by a dimensionless parameter,  $K$ , as

$$K = \frac{ka}{D} \tag{S1}$$

**An Approach Curve as Obtained Using Non-Milled Pipets.** An approach curve to a  $\text{SiO}_2$  substrate as obtained using a non-milled pipet is shown in Figure S2. The surface of non-milled tips is not smooth or perpendicular to the pipet length so that liquid/liquid interfaces supported by the tips do not approach very close to a substrate. Also, the closest distance between the substrate and non-milled tip significantly varies due to the irreproducible roughness and alignment of heat-pulled tips.

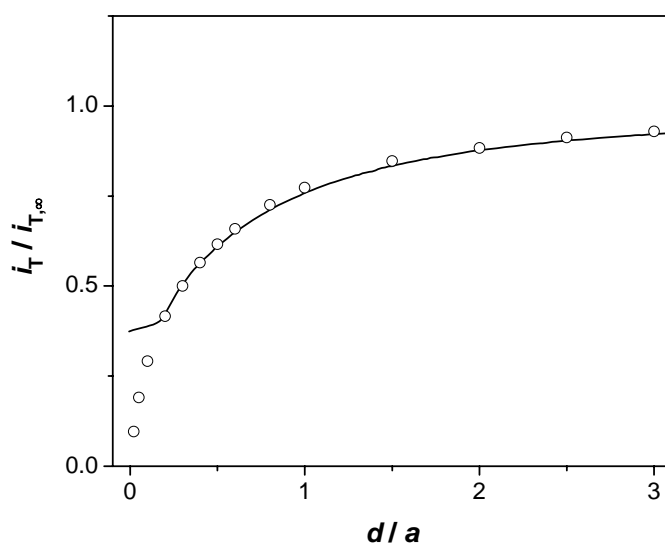

**Figure S2.** SECM approach curve to a  $\text{SiO}_2$  substrate as obtained using a non-milled micropipet for  $\text{TEA}^+$  (solid line). Probe scan rate,  $0.45 \mu\text{m/s}$ . The circles represent an approach curve simulated for an impermeable membrane with  $(a, h/a, r_g/a) = (1.5 \mu\text{m}, 0, 1.2)$ .

**Approach Curves with Protamine in 0.01 M PBS.** Figure S3 shows approach curves to a SiO<sub>2</sub> surface and a pnc-Si membrane in 0.01 M PBS as measured using a FIB-milled pipet when protamine is transferred across the interface (cell 3). The protrusion height of the interfaces is smaller in 0.01 M PBS than in 0.1 or 0.03 M PBS (see Figures 3b and 7).

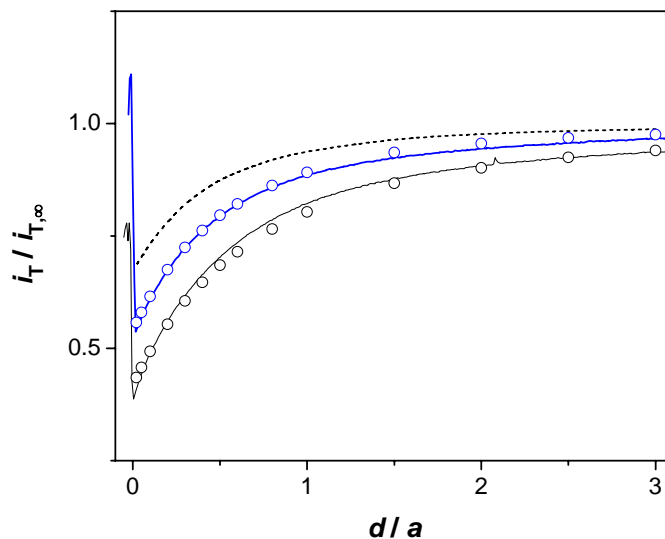

**Figure S3.** Approach curves to a nanopore membrane and a SiO<sub>2</sub> substrate (blue and black lines, respectively) for protamine in 0.01 M PBS. Probe scan rate, 0.23  $\mu\text{m/s}$ . The corresponding circles are simulated approach curves for permeable ( $k = 8.4 \times 10^{-4} \text{ cm/s}$ ) and impermeable membranes for  $(a, h/a, r_g/a) = (2.4 \text{ } \mu\text{m}, 0.23, 1.2)$  and  $(2.5 \text{ } \mu\text{m}, 0.23, 1.2)$ , respectively. The dashed line represents an approach curve simulated for diffusion-controlled permeability with  $l = 16 \text{ nm}$  in eq 2 ( $k_d = 2.8 \times 10^{-3} \text{ cm/s}$ ).

**Uniform and Heterogeneous Membrane Models for Derivation of Eq 2.** Eq 2 was derived as follows by considering steady-state ion flux,  $J$ , across the membrane based on uniform and heterogeneous membrane boundary conditions as reported elsewhere<sup>S2</sup> (the left- and right-hand sides of Figure S4, respectively).

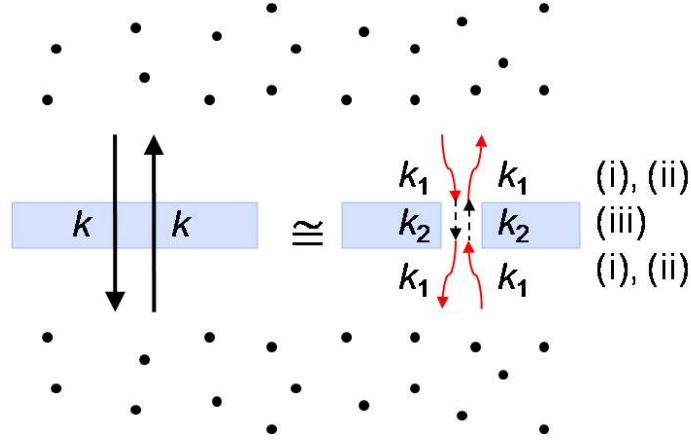

**Figure S4.** Uniform (left) and heterogeneous (right) membrane models used for the definition of membrane permeability.

In the uniform membrane model, the flux is given by membrane permeability,  $k$ , as

$$J = k[c_t(r, 0) - c_b(r, 0)] \quad (\text{S2})$$

where  $c_t(r, 0)$  and  $c_b(r, 0)$  are the concentrations of transported molecules near the membrane at its top- and bottom-solution sides, respectively. Eq S2 is the membrane boundary condition used for the finite element simulation (see above).

In the heterogeneous membrane model, membrane transport is considered as the combination of three diffusion processes, i.e., (i) diffusion from the solution to the pore orifice, (ii) diffusion from the pore orifice to the solution, and (iii) diffusion through the water-filled pores (Figure S4). The second step is a reverse process of the first step and the same rate constant,  $k_1$ , can be assigned to both steps. Moreover, the first step is equivalent to irreversible adsorption of molecules to randomly distributed disks with different radii that cover an impenetrable surface randomly without overlapping.<sup>S2</sup> According to effective medium theories based on Brownian dynamics simulations of this diffusion problem, the corresponding effective reaction rate,  $k_1$ , at the surface with a low surface coverage of the disks is given by<sup>S3</sup>

$$k_1 = 4DN\bar{r} \quad (\text{S3})$$

On the other hand, a rate constant for the third step,  $k_2$ , is given by

$$k_2 = \frac{\sigma D}{l} \quad (\text{S4})$$

Noticeably, ion size and ion–nanopore interaction were assumed to be negligible in this model.

Membrane flux based on the heterogeneous model is given as follows. At the top-solution side of the membrane, ion flux is given by

$$J = k_1[c_t(r, 0) - c_t] \quad (\text{S5})$$

where  $c_t$  is the concentration of transported molecules at the orifice of the nanopores at the top-solution side. This concentration was approximated to be uniform at all nanopores despite their different radii. Analogously, the flux at the bottom-solution side of the nanopores is given by

$$J = k_1[c_b - c_b(r, 0)] \quad (\text{S6})$$

where  $c_b$  is the concentration of transported molecules at the entrance of the nanopores at the bottom-solution side and is also approximated to be uniform for all pores. Finally, the flux through nanopores is given by

$$J = k_2(c_t - c_b) \quad (\text{S7})$$

Overall, the combination of eqs S5, S6, and S7 gives

$$J = \frac{k_1 k_2}{k_1 + 2k_2} [c_t(r, 0) - c_b(r, 0)] \quad (\text{S8})$$

The comparison of eq S8 with eq S2 gives

$$k = \frac{k_1 k_2}{k_1 + 2k_2} \quad (\text{S9})$$

In eq S9,  $k$  becomes equivalent to  $k_d$  when  $k_1$  and  $k_2$  are given by eqs S3 and S4 to represent diffusion-limited permeation, thereby yielding eq 2.

## REFERENCES

- (S1) Edwards, M. A.; Williams, C. G.; Whitworth, A. L.; Unwin, P. R. *Anal. Chem.* **2009**, *81*, 4482–4492.
- (S2) Kim, E.; Xiong, H.; Striemer, C. C.; Fang, D. Z.; Fauchet, P. M.; McGrath, J. L.; Amemiya, S. *J. Am. Chem. Soc.* **2008**, *130*, 4230–4231.
- (S3) Makhnovskii, Y. A.; Berezhkovskii, A. M.; Zitserman, V. Y. *J. Chem. Phys.* **2005**, *122*, 236102 and references cited therein.

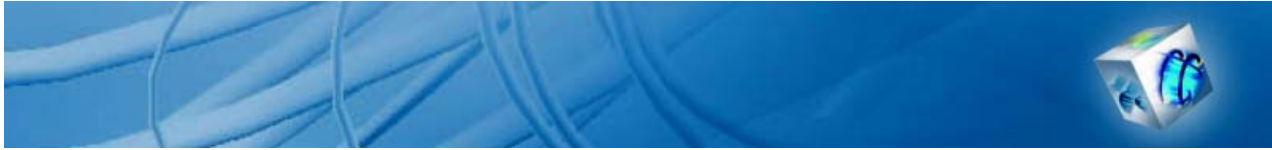

# COMSOL Model Report

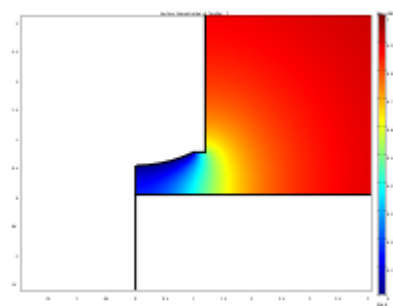

## 1. Table of Contents

- Title - COMSOL Model Report
- Table of Contents
- Model Properties
- Geometry
- Geom1
- Solver Settings
- Postprocessing
- Equations
- Variables

## 2. Model Properties

| Property   | Value |
|------------|-------|
| Model name |       |

|                |                         |
|----------------|-------------------------|
| Author         |                         |
| Company        |                         |
| Department     |                         |
| Reference      |                         |
| URL            |                         |
| Saved date     | Dec 12, 2009 1:50:21 PM |
| Creation date  | Aug 3, 2007 5:06:17 PM  |
| COMSOL version | COMSOL 3.5.0.608        |

File name: C:\nanopore.mph

Application modes and modules used in this model:

- Geom1 (Axial symmetry (2D))
  - Diffusion (Chemical Engineering Module)
  - Diffusion (Chemical Engineering Module)

### 3. Geometry

Number of geometries: 1

### 3.1. Geom1

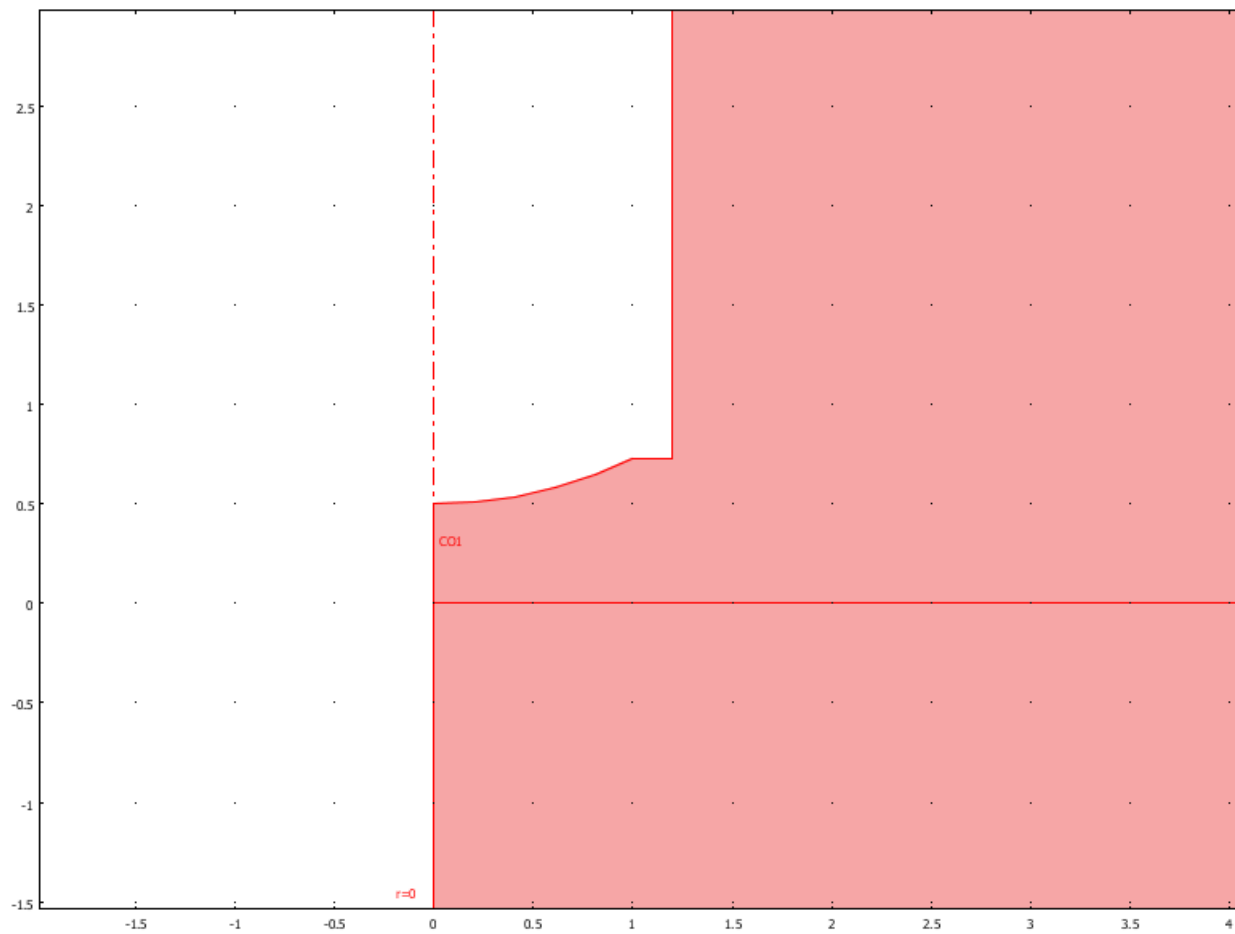

### 3.1.1. Point mode

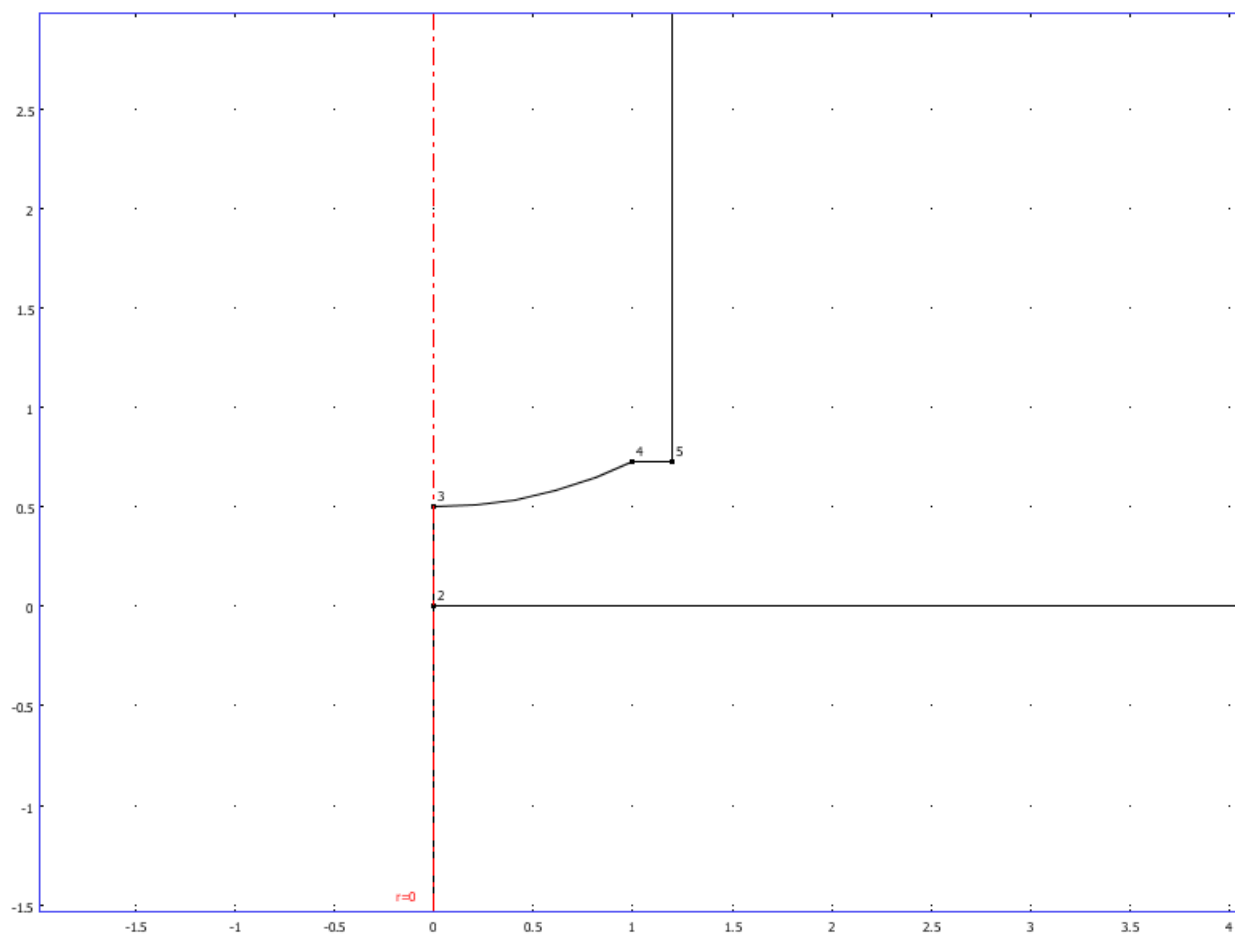

### 3.1.2. Boundary mode

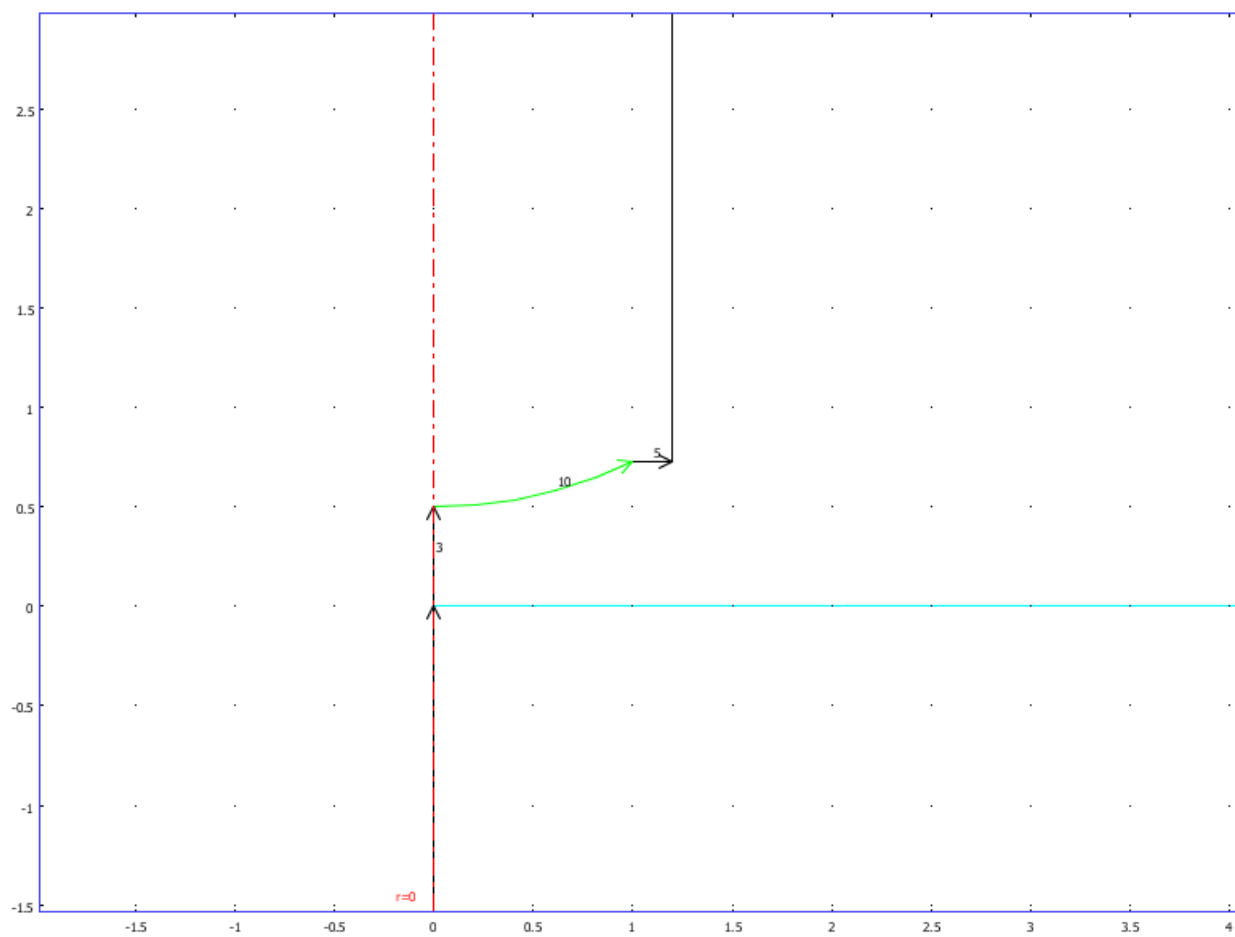

### 3.1.3. Subdomain mode

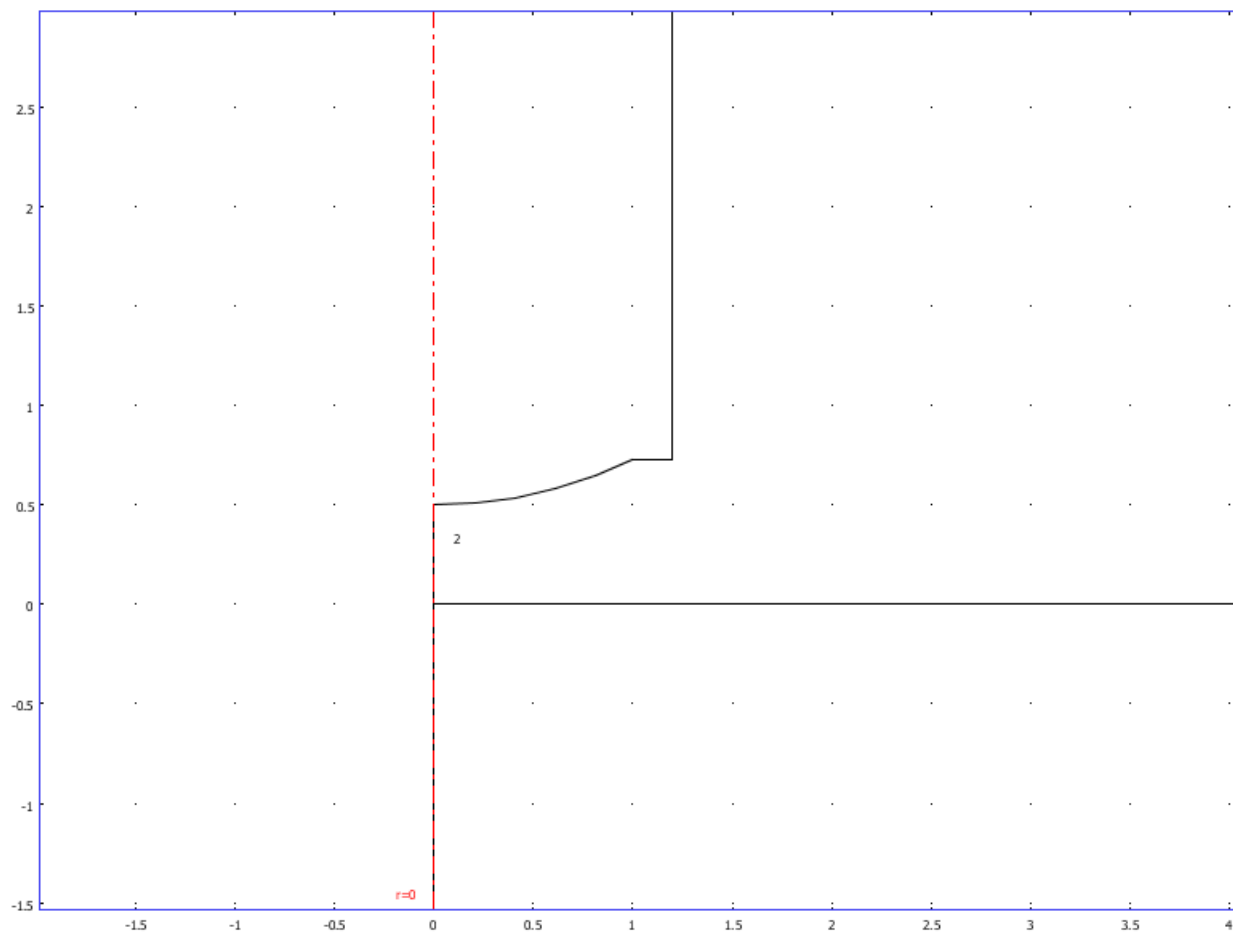

## 4. Geom1

Space dimensions: Axial symmetry (2D)

Independent variables:  $r$ ,  $\phi$ ,  $z$

### 4.1. Scalar Expressions

| Name | Expression | Unit | Description |
|------|------------|------|-------------|
| K    | 0.15       |      |             |

## **4.2. Mesh**

### **4.2.1. Mesh Statistics**

|                              |        |
|------------------------------|--------|
| Number of degrees of freedom | 201794 |
| Number of mesh points        | 50549  |
| Number of elements           | 100192 |
| Triangular                   | 100192 |
| Quadrilateral                | 0      |
| Number of boundary elements  | 1156   |
| Number of vertex elements    | 9      |
| Minimum element quality      | 0.829  |
| Element area ratio           | 0      |

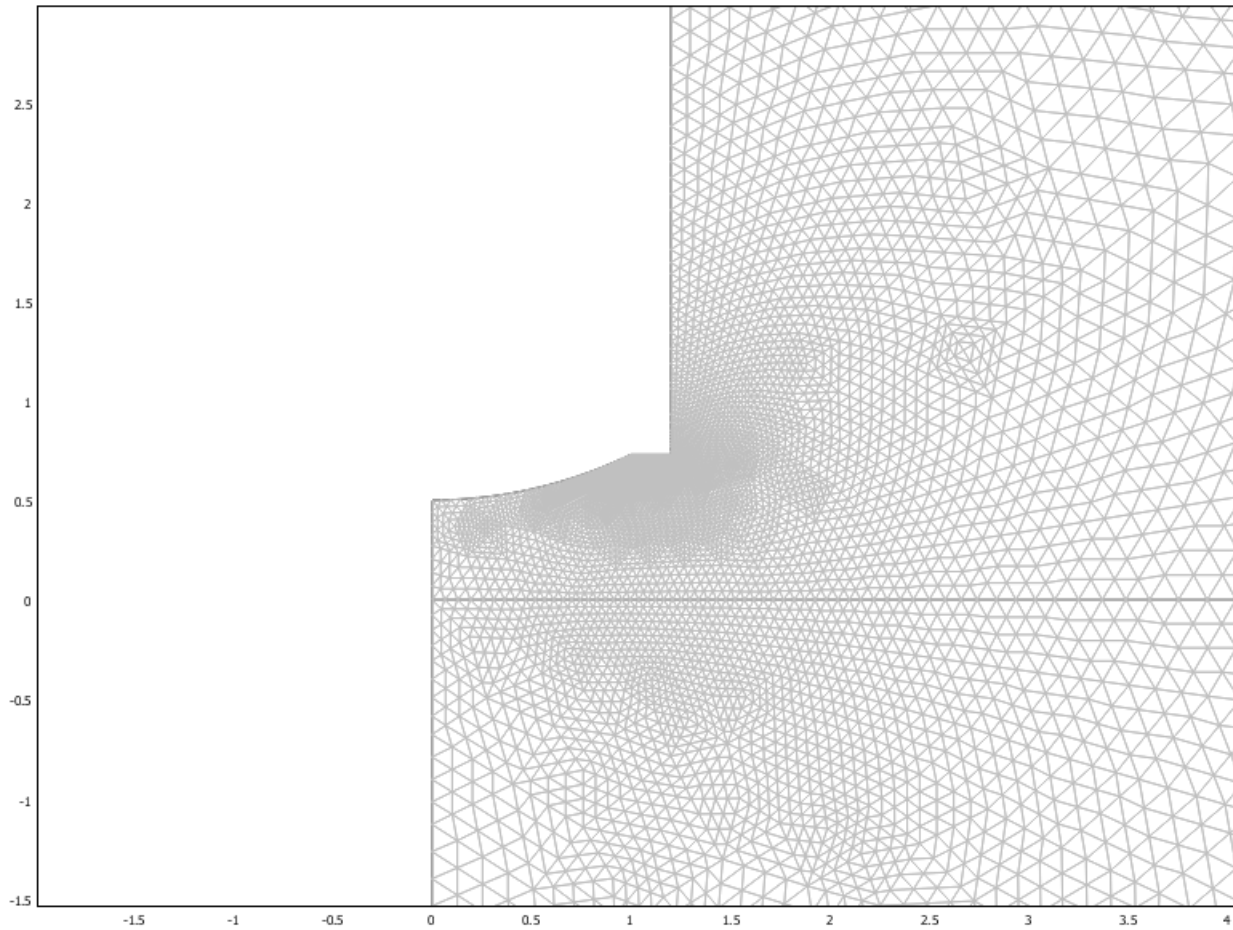

### 4.3. Application Mode: Diffusion (chdi)

Application mode type: Diffusion (Chemical Engineering Module)

Application mode name: chdi

#### 4.3.1. Application Mode Properties

| Property               | Value                |
|------------------------|----------------------|
| Default element type   | Lagrange - Quadratic |
| Analysis type          | Stationary           |
| Equilibrium assumption | Off                  |
| Frame                  | Frame (ref)          |

|                  |       |
|------------------|-------|
| Weak constraints | Off   |
| Constraint type  | Ideal |

#### 4.3.2. Variables

Dependent variables: c

Shape functions: shlag(2,'c')

Interior boundaries not active

Locked Boundaries: 10

#### 4.3.3. Boundary Settings

|                                |                    |                |               |               |
|--------------------------------|--------------------|----------------|---------------|---------------|
| Boundary                       |                    | 1              | 2, 8          | 4             |
| Type                           |                    | Axial symmetry | Concentration | Flux          |
| Mass transfer coefficient (kc) | m/s                | 0              | 0             | <b>0.25*K</b> |
| Bulk concentration (cb)        | mol/m <sup>3</sup> | 0              | 0             | <b>c2</b>     |
| Concentration (c0)             | mol/m <sup>3</sup> | 0              | <b>1</b>      | 0             |

#### 4.3.4. Subdomain Settings

|                           |                    |             |
|---------------------------|--------------------|-------------|
| Subdomain                 |                    | 1           |
| Diffusion coefficient (D) | m <sup>2</sup> /s  | <b>0.25</b> |
| Subdomain initial value   |                    | 1           |
| Concentration, c (c)      | mol/m <sup>3</sup> | 1           |

#### 4.4. Application Mode: Diffusion (chdi2)

Application mode type: Diffusion (Chemical Engineering Module)

Application mode name: chdi2

#### 4.4.1. Application Mode Properties

| Property               | Value                |
|------------------------|----------------------|
| Default element type   | Lagrange - Quadratic |
| Analysis type          | Stationary           |
| Equilibrium assumption | Off                  |
| Frame                  | Frame (ref)          |
| Weak constraints       | Off                  |
| Constraint type        | Ideal                |

#### 4.4.2. Variables

Dependent variables: c2

Shape functions: shlag(2,'c2')

Interior boundaries not active

Locked Boundaries: 10

#### 4.4.3. Boundary Settings

|                                |                    |                |               |                     |
|--------------------------------|--------------------|----------------|---------------|---------------------|
| Boundary                       |                    | 3              | 4             | 5-6, 10             |
| Type                           |                    | Axial symmetry | Flux          | Insulation/Symmetry |
| Mass transfer coefficient (kc) | m/s                | 0              | <b>0.25*K</b> | 0                   |
| Bulk concentration (cb)        | mol/m <sup>3</sup> | 0              | <b>c</b>      | 0                   |
| Concentration (c0)             | mol/m <sup>3</sup> | 0              | 0             | 0                   |
| Boundary                       |                    | 7, 9           |               |                     |
| Type                           |                    | Concentration  |               |                     |
| Mass transfer coefficient (kc) | m/s                | 0              |               |                     |

|                         |                    |   |
|-------------------------|--------------------|---|
| Bulk concentration (cb) | mol/m <sup>3</sup> | 0 |
| Concentration (c0)      | mol/m <sup>3</sup> | 1 |

#### 4.4.4. Subdomain Settings

|                           |                    |      |
|---------------------------|--------------------|------|
| Subdomain                 |                    | 2    |
| Diffusion coefficient (D) | m <sup>2</sup> /s  | 0.25 |
| Subdomain initial value   |                    | 2    |
| Concentration, c2 (c2)    | mol/m <sup>3</sup> | 1    |

## 5. Solver Settings

Solve using a script: off

|                          |            |
|--------------------------|------------|
| Analysis type            | Stationary |
| Auto select solver       | On         |
| Solver                   | Stationary |
| Solution form            | Automatic  |
| Symmetric                | auto       |
| Adaptive mesh refinement | Off        |
| Optimization/Sensitivity | Off        |
| Plot while solving       | Off        |

### 5.1. Direct (UMFPACK)

Solver type: Linear system solver

| Parameter       | Value |
|-----------------|-------|
| Pivot threshold | 0.1   |

|                          |     |
|--------------------------|-----|
| Memory allocation factor | 0.7 |
|--------------------------|-----|

### **5.2. Stationary**

| Parameter                           | Value     |
|-------------------------------------|-----------|
| Linearity                           | Automatic |
| Relative tolerance                  | 1.0E-6    |
| Maximum number of iterations        | 25        |
| Manual tuning of damping parameters | Off       |
| Highly nonlinear problem            | Off       |
| Initial damping factor              | 1.0       |
| Minimum damping factor              | 1.0E-4    |
| Restriction for step size update    | 10.0      |

### **5.3. Advanced**

| Parameter                                                              | Value       |
|------------------------------------------------------------------------|-------------|
| Constraint handling method                                             | Elimination |
| Null-space function                                                    | Automatic   |
| Automatic assembly block size                                          | On          |
| Assembly block size                                                    | 5000        |
| Use Hermitian transpose of constraint matrix and in symmetry detection | Off         |
| Use complex functions with real input                                  | Off         |
| Stop if error due to undefined operation                               | On          |
| Store solution on file                                                 | Off         |

|                              |           |
|------------------------------|-----------|
| Type of scaling              | Automatic |
| Manual scaling               |           |
| Row equilibration            | On        |
| Manual control of reassembly | Off       |
| Load constant                | On        |
| Constraint constant          | On        |
| Mass constant                | On        |
| Damping (mass) constant      | On        |
| Jacobian constant            | On        |
| Constraint Jacobian constant | On        |

## 6. Postprocessing

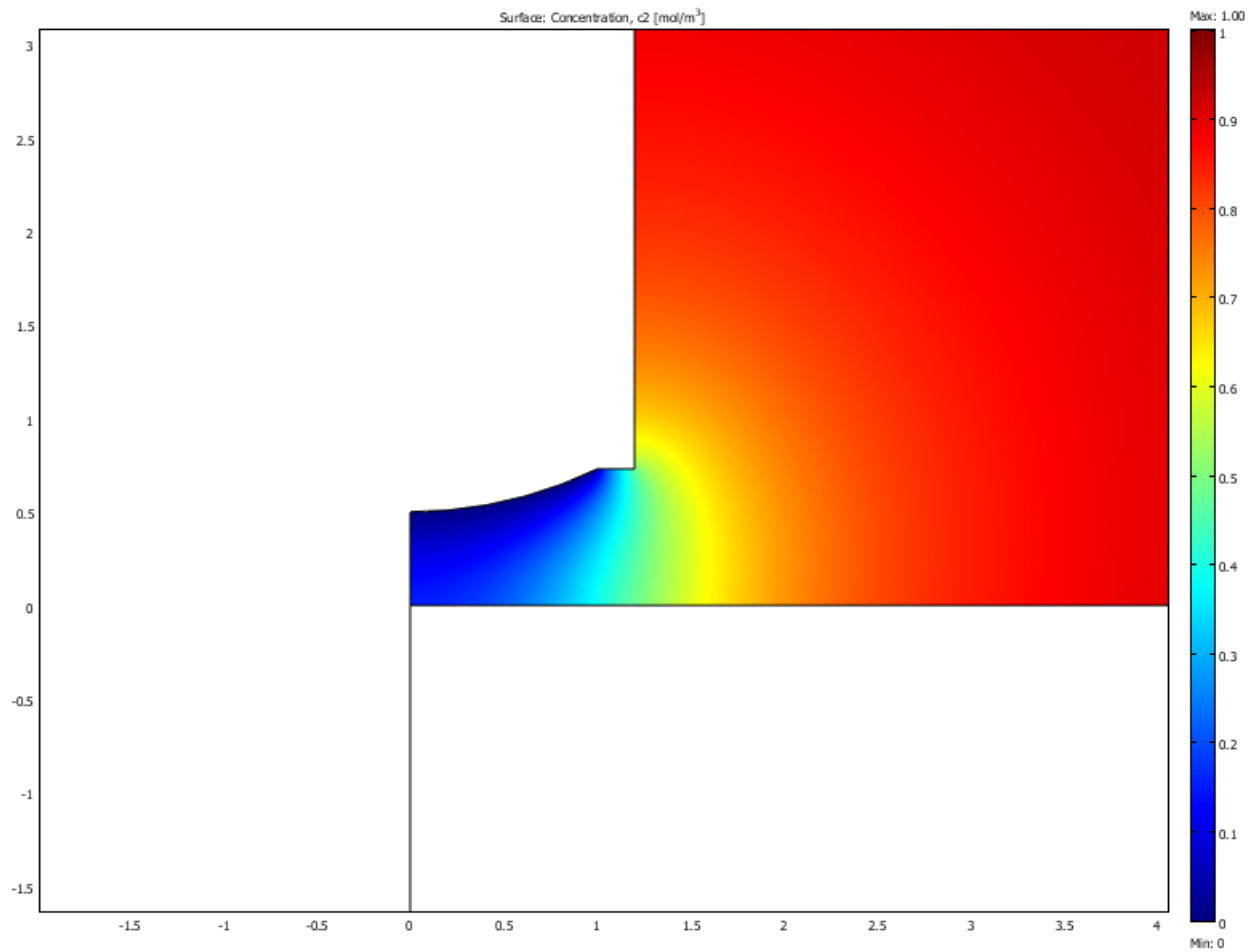

## 7. Equations

### 7.1. Boundary

Dependent variables:  $c$ ,  $c_2$

#### 7.1.1. Boundary: 10

$h$  coefficient

|     |       |
|-----|-------|
| $c$ | $c_2$ |
| 0   | 0     |

|               |                 |
|---------------|-----------------|
| $-d(-c_2, c)$ | $-d(-c_2, c_2)$ |
|---------------|-----------------|

r coefficient

|        |
|--------|
| 0      |
| $-c_2$ |

## 8. Variables

### 8.1. Boundary

#### 8.1.1. Boundary 1-2, 8

| Name            | Description                  | Unit                                     | Expression                                                                                |
|-----------------|------------------------------|------------------------------------------|-------------------------------------------------------------------------------------------|
| ndflux_c_chdi   | Normal diffusive<br>flux, c  | $\text{mol}/(\text{m}^2 \cdot \text{s})$ | $\text{nr\_chdi} * \text{dflux\_c\_r\_chdi} + \text{nz\_chdi} * \text{dflux\_c\_z\_chdi}$ |
| ndflux_c2_chdi2 | Normal diffusive<br>flux, c2 | $\text{mol}/(\text{m}^2 \cdot \text{s})$ |                                                                                           |

#### 8.1.2. Boundary 3, 5-7, 9-10

| Name            | Description                  | Unit                                     | Expression                                                                                      |
|-----------------|------------------------------|------------------------------------------|-------------------------------------------------------------------------------------------------|
| ndflux_c_chdi   | Normal diffusive<br>flux, c  | $\text{mol}/(\text{m}^2 \cdot \text{s})$ |                                                                                                 |
| ndflux_c2_chdi2 | Normal diffusive<br>flux, c2 | $\text{mol}/(\text{m}^2 \cdot \text{s})$ | $\text{nr\_chdi2} * \text{dflux\_c2\_r\_chdi2} + \text{nz\_chdi2} * \text{dflux\_c2\_z\_chdi2}$ |

#### 8.1.3. Boundary 4

| Name          | Description      | Unit                                     | Expression                                                       |
|---------------|------------------|------------------------------------------|------------------------------------------------------------------|
| ndflux_c_chdi | Normal diffusive | $\text{mol}/(\text{m}^2 \cdot \text{s})$ | $\text{nr\_chdi} * \text{dflux\_c\_r\_chdi} + \text{nz\_chdi} *$ |

|                 |                              |                         |                                                            |
|-----------------|------------------------------|-------------------------|------------------------------------------------------------|
|                 | flux, c                      |                         | dflux_c_z_chdi                                             |
| ndflux_c2_chdi2 | Normal diffusive<br>flux, c2 | mol/(m <sup>2</sup> *s) | nr_chdi2 * dflux_c2_r_chdi2+nz_chdi2 *<br>dflux_c2_z_chdi2 |

## 8.2. Subdomain

### 8.2.1. Subdomain 1

| Name            | Description                                   | Unit                    | Expression                                                      |
|-----------------|-----------------------------------------------|-------------------------|-----------------------------------------------------------------|
| grad_c_r_chdi   | Concentration<br>gradient, c, r<br>component  | mol/m <sup>4</sup>      | cr                                                              |
| dflux_c_r_chdi  | Diffusive flux, c, r<br>component             | mol/(m <sup>2</sup> *s) | -Drr_c_chdi * cr-Drz_c_chdi * cz                                |
| grad_c_z_chdi   | Concentration<br>gradient, c, z<br>component  | mol/m <sup>4</sup>      | cz                                                              |
| dflux_c_z_chdi  | Diffusive flux, c, z<br>component             | mol/(m <sup>2</sup> *s) | -Dzr_c_chdi * cr-Dzz_c_chdi * cz                                |
| grad_c_chdi     | Concentration<br>gradient, c                  | mol/m <sup>4</sup>      | sqrt(grad_c_r_chdi <sup>2</sup> +grad_c_z_chdi <sup>2</sup> )   |
| dflux_c_chdi    | Diffusive flux, c                             | mol/(m <sup>2</sup> *s) | sqrt(dflux_c_r_chdi <sup>2</sup> +dflux_c_z_chdi <sup>2</sup> ) |
| grad_c2_r_chdi2 | Concentration<br>gradient, c2, r<br>component | mol/m <sup>4</sup>      |                                                                 |

|                  |                                               |                         |  |
|------------------|-----------------------------------------------|-------------------------|--|
| dflux_c2_r_chdi2 | Diffusive flux, c2, r<br>component            | mol/(m <sup>2</sup> *s) |  |
| grad_c2_z_chdi2  | Concentration<br>gradient, c2, z<br>component | mol/m <sup>4</sup>      |  |
| dflux_c2_z_chdi2 | Diffusive flux, c2, z<br>component            | mol/(m <sup>2</sup> *s) |  |
| grad_c2_chdi2    | Concentration<br>gradient, c2                 | mol/m <sup>4</sup>      |  |
| dflux_c2_chdi2   | Diffusive flux, c2                            | mol/(m <sup>2</sup> *s) |  |

### 8.2.2. Subdomain 2

| Name           | Description                                  | Unit                    | Expression |
|----------------|----------------------------------------------|-------------------------|------------|
| grad_c_r_chdi  | Concentration<br>gradient, c, r<br>component | mol/m <sup>4</sup>      |            |
| dflux_c_r_chdi | Diffusive flux, c,<br>r component            | mol/(m <sup>2</sup> *s) |            |
| grad_c_z_chdi  | Concentration<br>gradient, c, z<br>component | mol/m <sup>4</sup>      |            |
| dflux_c_z_chdi | Diffusive flux, c,<br>z component            | mol/(m <sup>2</sup> *s) |            |

|                  |                                               |                         |                                                                      |
|------------------|-----------------------------------------------|-------------------------|----------------------------------------------------------------------|
| grad_c_chdi      | Concentration<br>gradient, c                  | mol/m <sup>4</sup>      |                                                                      |
| dflux_c_chdi     | Diffusive flux, c                             | mol/(m <sup>2</sup> *s) |                                                                      |
| grad_c2_r_chdi2  | Concentration<br>gradient, c2, r<br>component | mol/m <sup>4</sup>      | c2r                                                                  |
| dflux_c2_r_chdi2 | Diffusive flux, c2,<br>r component            | mol/(m <sup>2</sup> *s) | -Drr_c2_chdi2 * c2r-Drz_c2_chdi2 * c2z                               |
| grad_c2_z_chdi2  | Concentration<br>gradient, c2, z<br>component | mol/m <sup>4</sup>      | c2z                                                                  |
| dflux_c2_z_chdi2 | Diffusive flux, c2,<br>z component            | mol/(m <sup>2</sup> *s) | -Dzr_c2_chdi2 * c2r-Dzz_c2_chdi2 * c2z                               |
| grad_c2_chdi2    | Concentration<br>gradient, c2                 | mol/m <sup>4</sup>      | $\sqrt{\text{grad\_c2\_r\_chdi2}^2 + \text{grad\_c2\_z\_chdi2}^2}$   |
| dflux_c2_chdi2   | Diffusive flux, c2                            | mol/(m <sup>2</sup> *s) | $\sqrt{\text{dflux\_c2\_r\_chdi2}^2 + \text{dflux\_c2\_z\_chdi2}^2}$ |
